# Supplementary material for: A Facile Fabrication of a Potentiometric Arrayed Glucose Biosensor Based on Nafion-GOx/GO/AZO
Source: PubMed Central journal article supplement (PMC7071120; doi:10.3390/s20040964), 2020-02-11
Supplement: sensors-20-00964-s001.pdf [file sensors-20-00964-s001.pdf]

## Supplementary Materials

(a)

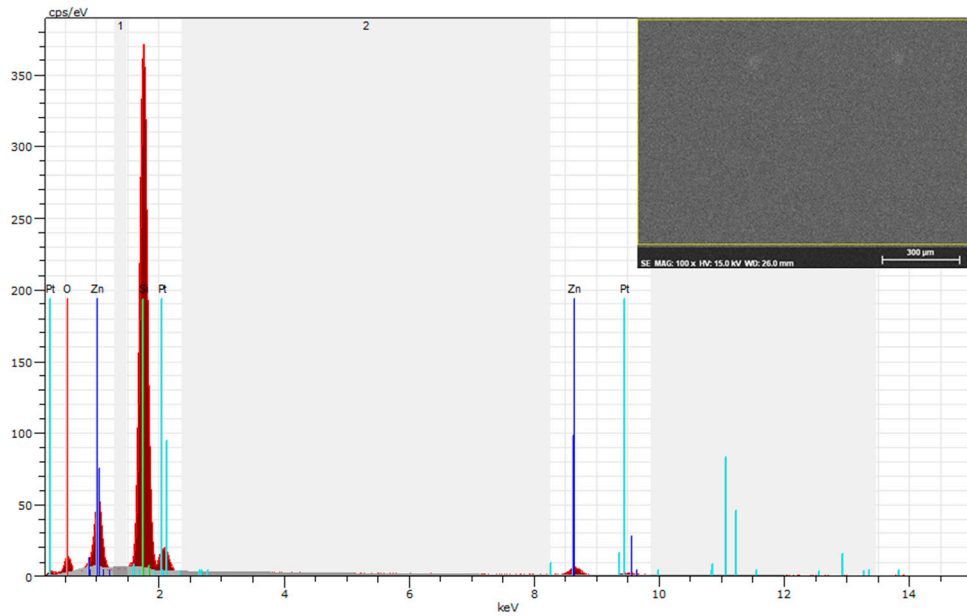

(b)

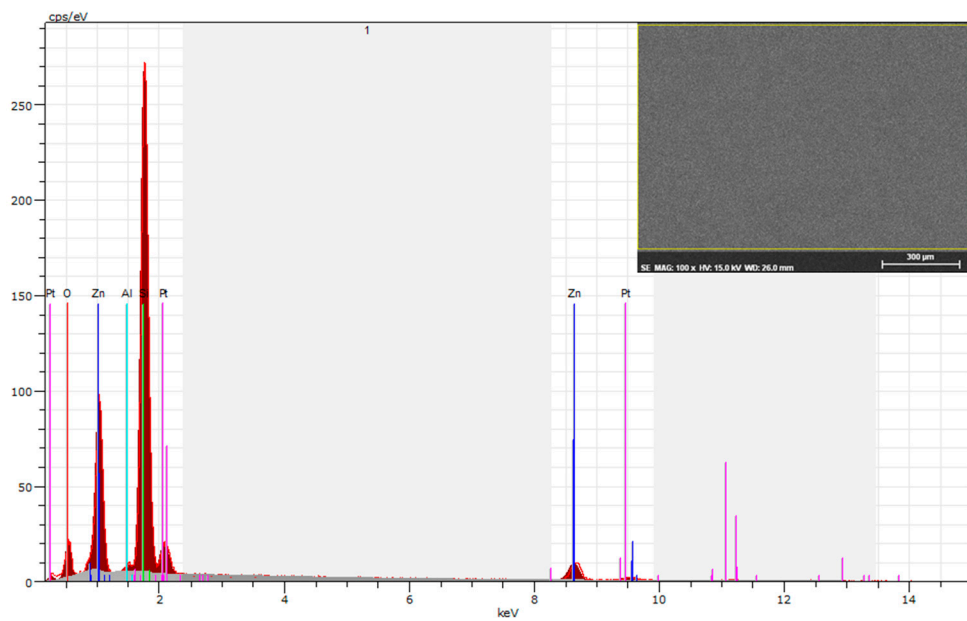

**Figure S1.** EDX spectra of different membranes: (a) ZnO and (b) AZO.

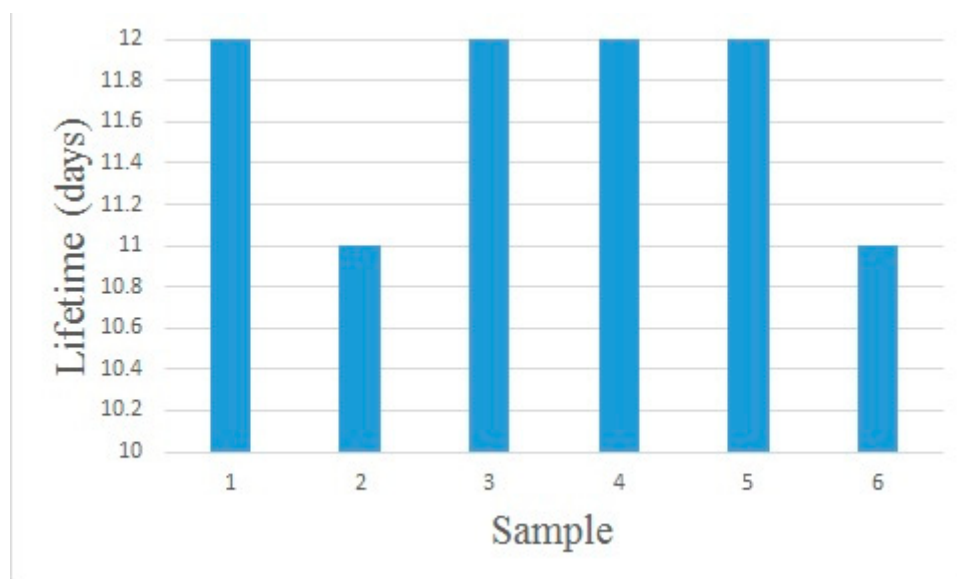

**Figure S2.** The reducibility test for the lifetime of the glucose biosensors.

**Table S1.** *p*-value for response voltages intervals under different glucose concentrations.

| Membrane          | Interval of Concentration | N (6 windows) | Degree of freedom | <i>p</i> -Value (Two-Tailed Tests) | Significance |
|-------------------|---------------------------|---------------|-------------------|------------------------------------|--------------|
| Nafion-GOx/GO/ZnO | (0, 2)                    | 6             | 2                 | $1.92 \times 10^{-3}$              | **           |
|                   | (2, 4)                    |               |                   | $2.17 \times 10^{-5}$              | ***          |
|                   | (4, 6)                    |               |                   | $4.72 \times 10^{-7}$              | ***          |
|                   | (6, 8)                    |               |                   | $8.27 \times 10^{-7}$              | ***          |
|                   | (8, 10)                   |               |                   | $9.87 \times 10^{-6}$              | ***          |
|                   | (10, 12)                  |               |                   | $9.32 \times 10^{-3}$              | **           |
|                   | (12, 14)                  |               |                   | $1.14 \times 10^{-6}$              | N/A          |
| Nafion-GOx/GO/AZO | (0, 2)                    | 6             | 2                 | $6.06 \times 10^{-4}$              | ***          |
|                   | (2, 4)                    |               |                   | $2.51 \times 10^{-5}$              | ***          |
|                   | (4, 6)                    |               |                   | $6.37 \times 10^{-7}$              | ***          |
|                   | (6, 8)                    |               |                   | $8.32 \times 10^{-7}$              | ***          |
|                   | (8, 10)                   |               |                   | $4.47 \times 10^{-5}$              | ***          |
|                   | (10, 12)                  |               |                   | $3.72 \times 10^{-2}$              | *            |
|                   | (12, 14)                  |               |                   | $1.97 \times 10^{-1}$              | N/A          |
